# Supplementary material for: Ongoing Increase in Incidence of Diabetes in Austrian Children and Adolescents (1989–2021): Results from a Nationwide Registry
Source: Hindawi journal article supplement (doi:10.1155/2023/4616903), 2023-08-18

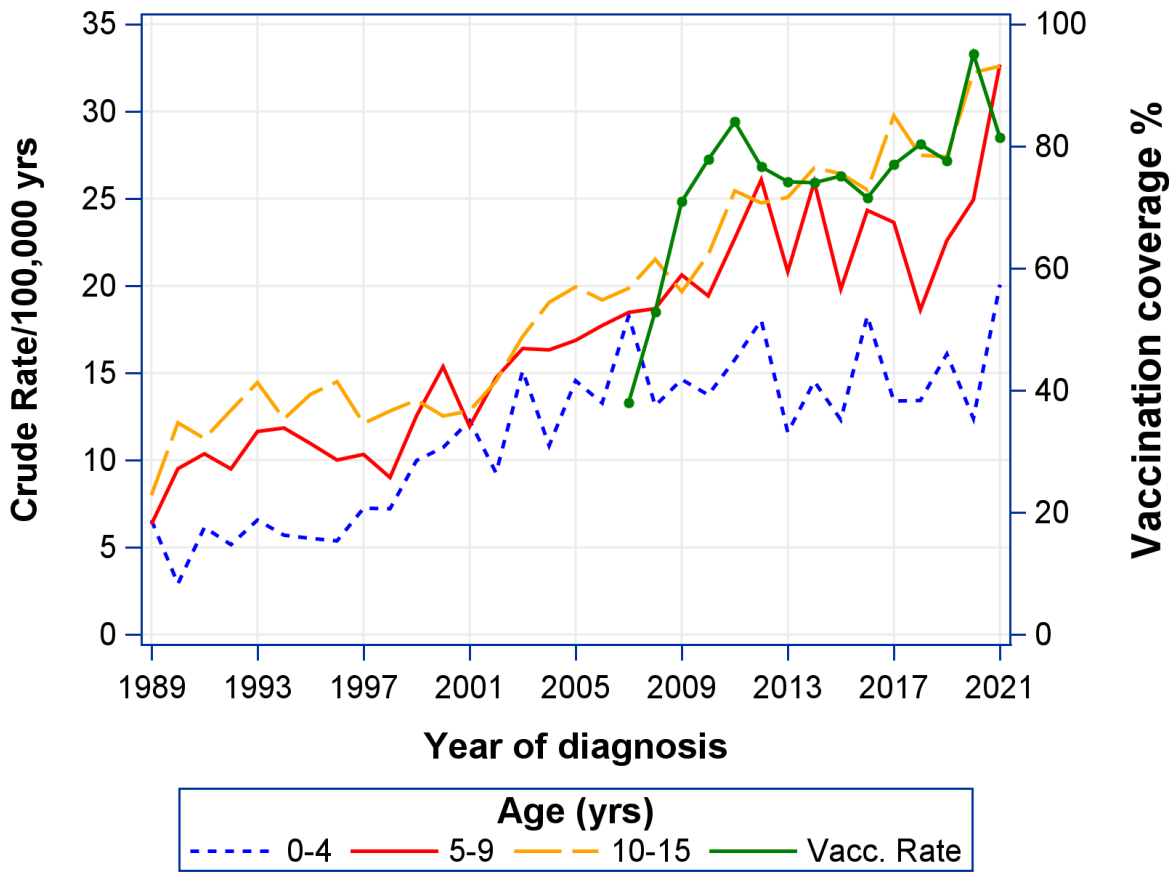

Supplement: f3 [file 4616903.f3.pdf]
