# Supplementary material for: Ongoing Increase in Incidence of Diabetes in Austrian Children and Adolescents (1989–2021): Results from a Nationwide Registry
Source: Hindawi journal article supplement (doi:10.1155/2023/4616903), 2023-08-18

**Non-Austrians %**

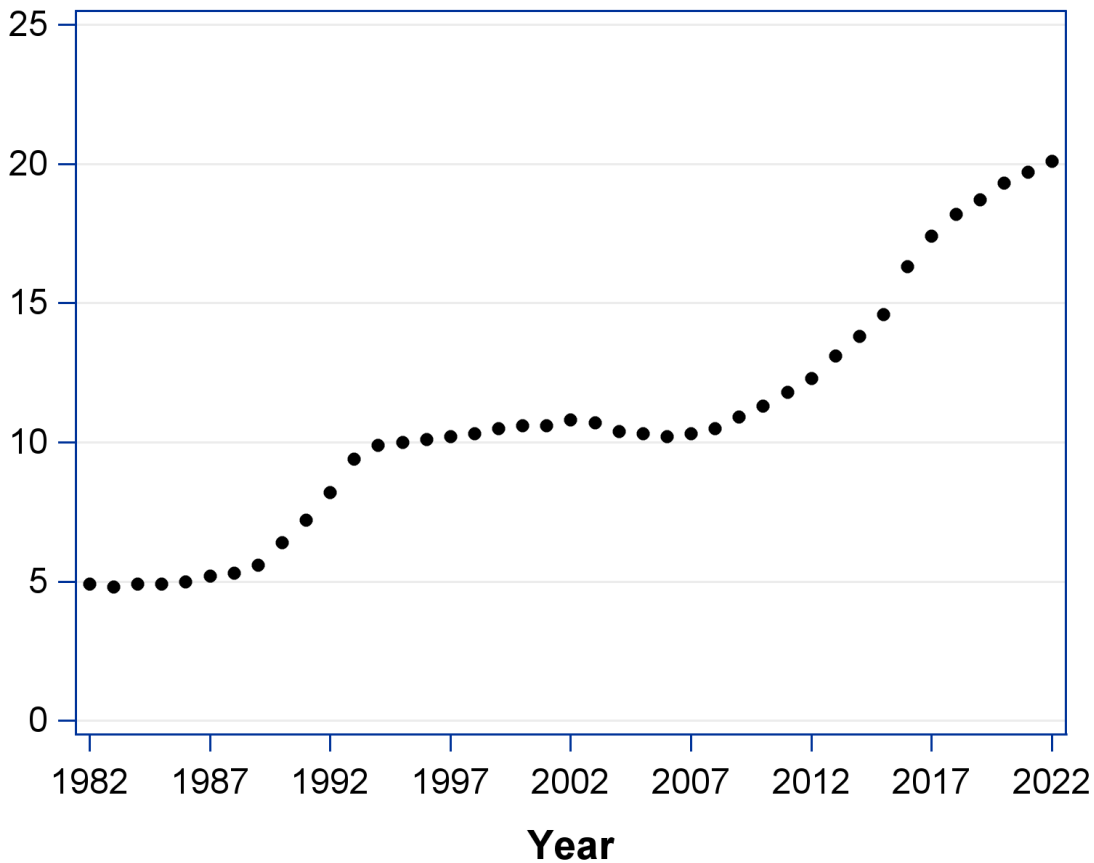

Supplement: f4 [file 4616903.f4.pdf]
